# Supplementary material for: A DNA barcoding method for identifying and quantifying the composition of pollen species collected by European honeybees, Apis mellifera (Hymenoptera: Apidae)
Source: PubMed Central journal article supplement (PMC6060998; doi:10.1007/s13355-018-0565-9), 2018-05-16
Supplement: 13355_2018_565_MOESM1_ESM.pdf [file 13355_2018_565_MOESM1_ESM.pdf]

**Table S1** Weights of pollen pellets trapped at Site 5 in Shibetsu City, Hokkaido

|   | Date              | Sampling time | Trapped pollen pellets<br>(g fresh weight/h) |
|---|-------------------|---------------|----------------------------------------------|
| 1 | 21 July 2016      | 10:18–13:18   | 2.94                                         |
| 2 | 26 July 2016      | 10:20–13:20   | 2.41                                         |
| 3 | 3 August 2016     | 09:35–12:00   | 4.26                                         |
| 4 | 10 August 2016    | 08:56–11:56   | 1.56                                         |
| 5 | 18 August 2016    | 09:45–12:39   | 6.44                                         |
| 6 | 25 August 2016    | 09:05–12:05   | 10.04                                        |
| 7 | 2 September 2016  | 09:05–12:05   | 8.01                                         |
| 8 | 8 September 2016  | 08:35–11:35   | 2.99                                         |
| 9 | 14 September 2016 | 09:11–12:11   | 2.20                                         |
