# Supplementary material for: A DNA barcoding method for identifying and quantifying the composition of pollen species collected by European honeybees, Apis mellifera (Hymenoptera: Apidae)
Source: PubMed Central journal article supplement (PMC6060998; doi:10.1007/s13355-018-0565-9), 2018-05-16
Supplement: 13355_2018_565_MOESM2_ESM.pdf [file 13355_2018_565_MOESM2_ESM.pdf]

**Table S2** *trnL-trnF* molecular identification of honeybee pollen pellets collected in Hokkaido, northern Japan

| No. <sup>a</sup> | Identified plant                    | Species in a monophyletic group with a pollen pellet in the phylogenetic tree <sup>b</sup> |                                                                                                                                                                            |
|------------------|-------------------------------------|--------------------------------------------------------------------------------------------|----------------------------------------------------------------------------------------------------------------------------------------------------------------------------|
|                  |                                     | Distributed in study area                                                                  | Not reported in study area                                                                                                                                                 |
| 1                | <i>Actinidia polygama</i>           | <i>Actinidia polygama</i>                                                                  | <i>Actinidia valvata</i> var. <i>valvata</i>                                                                                                                               |
| 2                | <i>Angelica</i> sp.                 | —                                                                                          | <i>Angelica nitida</i>                                                                                                                                                     |
| 3                | <i>Artemisia</i> sp.                | <i>Artemisia indica</i> var.<br><i>maximowiczii</i> , <i>Artemisia montana</i>             | <i>Artemisia argyi</i>                                                                                                                                                     |
| 4                | <i>Asparagus officinalis</i>        | <i>Asparagus officinalis</i>                                                               | —                                                                                                                                                                          |
| 5                | <i>Chelidonium majus</i>            | <i>Chelidonium majus</i>                                                                   | —                                                                                                                                                                          |
| 6                | <i>Chenopodium album</i>            | <i>Chenopodium album</i>                                                                   | <i>Chenopodium gigantospermum</i> var. <i>standleyanum</i>                                                                                                                 |
| 7                | <i>Cirsium vulgare</i>              | <i>Cirsium vulgare</i>                                                                     | <i>Cirsium carniolicum</i> subsp. <i>rufescens</i> , <i>Cirsium echinus</i> , <i>Cirsium lidjiangense</i>                                                                  |
| 10               | <i>Fagopyrum esculentum</i>         | <i>Fagopyrum esculentum</i>                                                                | —                                                                                                                                                                          |
| 11               | <i>Fallopia sachalinensis</i>       | <i>Fallopia sachalinensis</i>                                                              | <i>Fallopia japonica</i>                                                                                                                                                   |
| 12               | <i>Filipendula</i> sp.              | —                                                                                          | <i>Filipendula ulmaria</i>                                                                                                                                                 |
| 13               | <i>Hydrangea paniculata</i>         | <i>Hydrangea paniculata</i>                                                                | <i>Hydrangea heteromalla</i>                                                                                                                                               |
| 14               | <i>Hydrangea petiolaris</i>         | <i>Hydrangea petiolaris</i>                                                                | —                                                                                                                                                                          |
| 15               | <i>Hypochaeris radicata</i>         | <i>Hypochaeris radicata</i>                                                                | <i>Hypochaeris glabra</i>                                                                                                                                                  |
| 16               | <i>Kalopanax septemlobus</i>        | <i>Kalopanax septemlobus</i>                                                               | —                                                                                                                                                                          |
| 18               | <i>Oryza sativa</i>                 | <i>Oryza sativa</i>                                                                        | <i>Oryza barthii</i> , <i>Oryza glaberrima</i> , <i>Oryza glumipatula</i> , <i>Oryza meridionalis</i> , <i>Oryza nivara</i> , <i>Oryza rufipogon</i>                       |
| 19               | <i>Parasenecio</i> sp.              | —                                                                                          | <i>Parasenecio deltophyllus</i> , <i>Parasenecio maowenensis</i>                                                                                                           |
| 20               | <i>Plantago</i> sp.                 | —                                                                                          | <i>Plantago argentea</i> , <i>Plantago leiopetala</i>                                                                                                                      |
| 22               | <i>Rudbeckia hirta</i> <sup>c</sup> | <i>Rudbeckia hirta</i>                                                                     | <i>Ratibida columnaris</i>                                                                                                                                                 |
| 25               | <i>Solanum nigrum</i>               | <i>Solanum nigrum</i>                                                                      | <i>Solanum opacum</i> , <i>Solanum retroflexum</i> , <i>Solanum scabrum</i> , <i>Solanum tarderemotum</i> , <i>Solanum umalilaense</i> , <i>Solanum villosum</i>           |
| 26               | <i>Solidago gigantea</i>            | <i>Solidago gigantea</i>                                                                   | <i>Solidago elongata</i>                                                                                                                                                   |
| 27               | <i>Solidago</i> sp.                 | —                                                                                          | <i>Solidago decurrens</i> , <i>Solidago litoralis</i>                                                                                                                      |
| 28               | <i>Tilia</i> sp.                    | <i>Tilia japonica</i> , <i>Tilia miqueliana</i>                                            | <i>Tilia amurensis</i> , <i>Tilia mandshurica</i> , <i>Tilia megaphylla</i> , <i>Tilia oliveri</i> , <i>Tilia paucicostata</i> , <i>Tilia rufa</i> , <i>Tilia taquetii</i> |
| 29               | <i>Trifolium</i> sp.                | <i>Trifolium pratense</i> ,<br><i>Trifolium repens</i>                                     | <i>Trifolium alpestre</i> , <i>Trifolium caudatum</i> , <i>Trifolium heldreichianum</i> , <i>Trifolium pannonicum</i> , <i>Trifolium velebiticum</i>                       |
| 30               | <i>Trifolium repens</i>             | <i>Trifolium repens</i>                                                                    | —                                                                                                                                                                          |
| 31               | <i>Zea mays</i>                     | <i>Zea mays</i>                                                                            | <i>Zea diploperennis</i> , <i>Zea luxurians</i> , <i>Zea nicaraguensis</i> , <i>Zea perennis</i>                                                                           |

<sup>a</sup> Pollen pellets No. 8, 9, 17, 21, 23, and 24 showed no amplification in PCR.

<sup>b</sup> Subclade(s) within a monophyletic group were excluded. Floral and phenological information was confirmed by reference to the literature (Ohashi et al. 2015, 2016a, 2016b, 2017a, 2017b; Shimizu 2003).

<sup>c</sup> Together with identification using ITS2, No. 22 was identified as *Rudbeckia laciniata* (see Table 1)
