# Supplementary material for: A DNA barcoding method for identifying and quantifying the composition of pollen species collected by European honeybees, Apis mellifera (Hymenoptera: Apidae)
Source: PubMed Central journal article supplement (PMC6060998; doi:10.1007/s13355-018-0565-9), 2018-05-16
Supplement: 13355_2018_565_MOESM3_ESM.pdf [file 13355_2018_565_MOESM3_ESM.pdf]

**Table S3** ITS2 molecular identification of honeybee pollen pellets collected in Hokkaido, northern Japan

| No. <sup>a</sup> | Identified plant                | Species in a monophyletic group with a pollen pellet in the phylogenetic tree <sup>b</sup> |                                                                                                                                                                                                                                                              |
|------------------|---------------------------------|--------------------------------------------------------------------------------------------|--------------------------------------------------------------------------------------------------------------------------------------------------------------------------------------------------------------------------------------------------------------|
|                  |                                 | Distributed in study area                                                                  | Not reported in study area                                                                                                                                                                                                                                   |
| 1                | <i>Actinidia polygama</i>       | <i>Actinidia polygama</i>                                                                  | —                                                                                                                                                                                                                                                            |
| 2                | <i>Angelica</i> sp.             | —                                                                                          | <i>Angelica dahurica</i> var. <i>formosana</i>                                                                                                                                                                                                               |
| 3                | <i>Artemisia montana</i>        | <i>Artemisia montana</i>                                                                   | <i>Artemisia stelleriana</i>                                                                                                                                                                                                                                 |
| 4                | <i>Asparagus officinalis</i>    | <i>Asparagus officinalis</i>                                                               | —                                                                                                                                                                                                                                                            |
| 5                | <i>Chelidonium majus</i>        | <i>Chelidonium majus</i>                                                                   | —                                                                                                                                                                                                                                                            |
| 6                | <i>Chenopodium</i> sp.          | <i>Chenopodium album</i> ,<br><i>Chenopodium murale</i>                                    | <i>Chenopodium acuminatum</i> subsp. <i>virgatum</i> , <i>Chenopodium berlandieri</i> , <i>Chenopodium giganteum</i> , <i>Chenopodium gigantospermum</i> var. <i>standleyanum</i> , <i>Chenopodium opulifolium</i> ,<br><i>Chenopodium novopokrovskyanum</i> |
| 7                | <i>Cirsium vulgare</i>          | <i>Cirsium vulgare</i>                                                                     | <i>Cirsium muticum</i>                                                                                                                                                                                                                                       |
| 9                | <i>Cucurbita maxima</i>         | <i>Cucurbita maxima</i>                                                                    | —                                                                                                                                                                                                                                                            |
| 12               | <i>Filipendula camtschatica</i> | <i>Filipendula camtschatica</i>                                                            | —                                                                                                                                                                                                                                                            |
| 13               | <i>Hydrangea paniculata</i>     | <i>Hydrangea paniculata</i>                                                                | —                                                                                                                                                                                                                                                            |
| 15               | <i>Hypochaeris radicata</i>     | <i>Hypochaeris radicata</i>                                                                | <i>Agoseris elata</i> , <i>Taraxacum alpinum</i>                                                                                                                                                                                                             |
| 16               | <i>Kalopanax septemlobus</i>    | <i>Kalopanax septemlobus</i>                                                               | —                                                                                                                                                                                                                                                            |
| 19               | Senecioneae                     |                                                                                            | <i>Cremanthodium humile</i> , <i>Parasenecio adenostyloides</i> ,<br><i>Parasenecio firmus</i> , <i>Parasenecio subglaber</i> , <i>Syneilesis palmata</i>                                                                                                    |
| 20               | <i>Plantago lanceolata</i>      | <i>Plantago lanceolata</i>                                                                 | <i>Plantago lagopus</i> , <i>Plantago leiopetala</i>                                                                                                                                                                                                         |
| 21               | <i>Plantago</i> sp.             | <i>Plantago asiatica</i> , <i>Plantago major</i>                                           | <i>Plantago cornuti</i> , <i>Plantago erosa</i> , <i>Plantago hostifolia</i> ,<br><i>Plantago uniglumis</i>                                                                                                                                                  |
| 22               | <i>Rudbeckia laciniata</i>      | <i>Rudbeckia laciniata</i>                                                                 | —                                                                                                                                                                                                                                                            |
| 23               | <i>Sagittaria trifolia</i>      | <i>Sagittaria trifolia</i>                                                                 | —                                                                                                                                                                                                                                                            |
| 24               | <i>Sinapis alba</i>             | <i>Sinapis alba</i>                                                                        | —                                                                                                                                                                                                                                                            |
| 25               | <i>Solanum nigrum</i>           | <i>Solanum nigrum</i>                                                                      | <i>Solanum americanum</i> , <i>Solanum clavatum</i> , <i>Solanum physalifolium</i>                                                                                                                                                                           |
| 26               | <i>Solidago gigantea</i>        | <i>Solidago gigantea</i>                                                                   | —                                                                                                                                                                                                                                                            |
| 27               | <i>Solidago virgaurea</i>       | <i>Solidago virgaurea</i>                                                                  | —                                                                                                                                                                                                                                                            |
| 28               | <i>Tilia</i> sp.                | <i>Tilia japonica</i> , <i>Tilia maximowicziana</i> , <i>Tilia miqueliana</i>              | <i>Tilia koreana</i> , <i>Tilia oliveri</i> , <i>Tilia tuan</i>                                                                                                                                                                                              |
| 29               | <i>Trifolium pratense</i>       | <i>Trifolium pratense</i>                                                                  | <i>Trifolium caudatum</i> , <i>Trifolium cherleri</i>                                                                                                                                                                                                        |
| 30               | <i>Trifolium repens</i>         | <i>Trifolium repens</i>                                                                    | —                                                                                                                                                                                                                                                            |

<sup>a</sup> Pollen pellets No. 8, 10, 11, 14, 17, 18, and 31 showed no amplification in PCR.

<sup>b</sup> Subclade(s) within a monophyletic group were excluded. Floral and phenological information was confirmed by reference to the literature (Ohashi et al. 2015, 2016a, 2016b, 2017a, 2017b; Shimizu 2003).
