# Supplementary material for: A DNA barcoding method for identifying and quantifying the composition of pollen species collected by European honeybees, Apis mellifera (Hymenoptera: Apidae)
Source: PubMed Central journal article supplement (PMC6060998; doi:10.1007/s13355-018-0565-9), 2018-05-16
Supplement: 13355_2018_565_MOESM7_ESM.pdf [file 13355_2018_565_MOESM7_ESM.pdf]

**Fig. S3 Molecular phylogenetic tree of honeybee pollen pellet by maximum likelihood method in *psbA-trnH***

The evolutionary history was inferred by using the maximum likelihood method based on the Tamura–Nei model. The tree with the highest log likelihood (−730.8411) is shown. The percentage of trees in which the associated taxa clustered together is shown next to the branches. Initial tree(s) for the heuristic search were obtained automatically by applying the Neighbor-Join and BioNJ algorithms to a matrix of pairwise distances estimated using the maximum composite likelihood approach, and then selecting the topology with superior log likelihood value. The tree is drawn to scale, with branch lengths indicating the number of substitutions per site. The analysis involved 14 nucleotide sequences. All positions containing gaps and missing data were eliminated. There were a total of 370 positions in the final dataset. Evolutionary analyses were conducted in MEGA7.

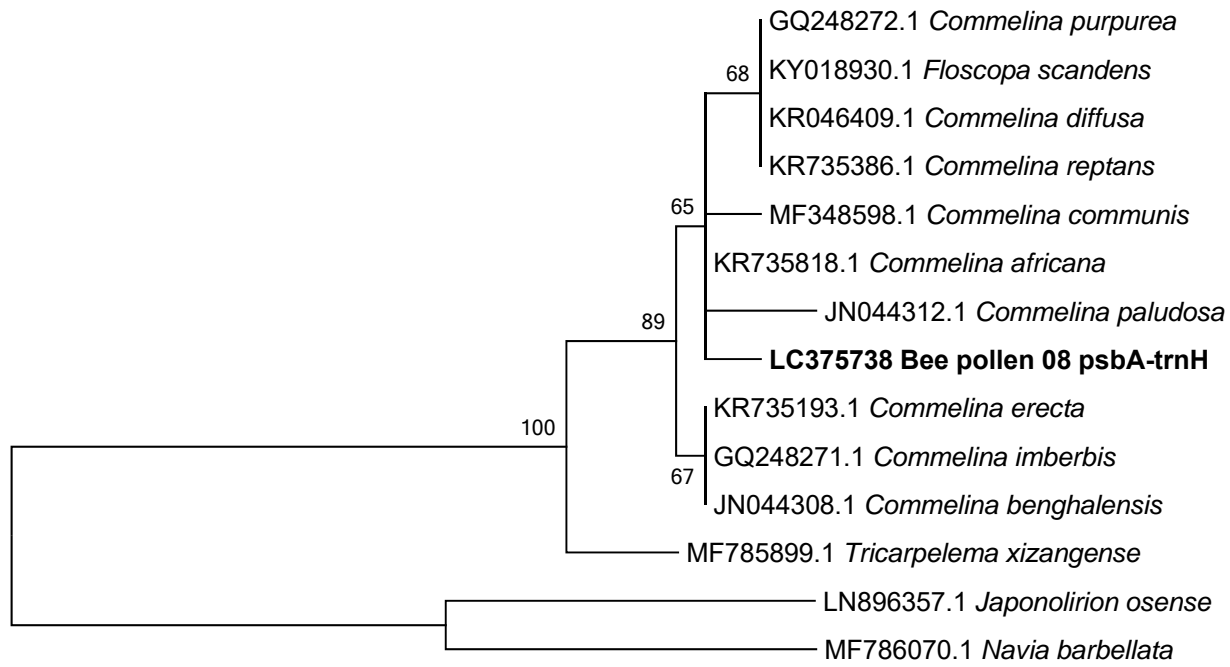

0.0050
